# Supplementary material
Source: PubMed Central journal article supplement (PMC6347671)
Supplement: pnas.1813775116.sapp.pdf [file pnas.1813775116.sapp.pdf]

1 **Conserved Transcriptomic Profiles Underpin Monogamy across**  
2 **Vertebrates**

3  
4 Rebecca L. Young<sup>a,b,1</sup>, Michael H. Ferkin<sup>c</sup>, Nina F. Ockendon-Powell<sup>d</sup>, Veronica N. Orr<sup>e</sup>,  
5 Steven M. Phelps<sup>a,f</sup>, Ákos Pogány<sup>g</sup>, Corinne L. Richards-Zawacki<sup>h</sup>, Kyle Summers<sup>i</sup>,  
6 Tamás Székely<sup>d,j,k</sup>, Brian C. Trainor<sup>e</sup>, Araxi O. Urrutia<sup>j,l</sup>, Gergely Zachar<sup>m</sup>, Lauren A.  
7 O'Connell<sup>n</sup>, and Hans A. Hofmann<sup>a,b,f,1</sup>

8  
9 <sup>1</sup>correspondence to: [youngrl@utexas.edu](mailto:youngrl@utexas.edu); [hans@utexas.edu](mailto:hans@utexas.edu)

10

## 11 **Materials and Methods**

### 12 **Sample collection and RNA extraction**

13 Reproductive males of each focal species were sacrificed and brains were rapidly  
14 dissected and stored to preserve RNA (species-specific details provided below). All animal  
15 care and use practices were approved by the respective institutions. For each species,  
16 RNA from three individuals was pooled to create an aggregate sample for transcriptome  
17 comparison. The focus of this study is to characterize similarity among species with  
18 independent species-level transitions to a monogamous mating system rather than to  
19 characterize individual-level variation in gene expression. Pooled samples are reflective  
20 of species-level gene expression variation of each species and limit potentially  
21 confounding individual variation for species-level comparisons (1, 2). While exploration of  
22 individual variation is critical to identify mechanisms underlying differences in behavioral  
23 expression, high levels of variation between two pooled samples of conspecifics could  
24 obscure more general species-specific gene expression patterns. Note that two pooled  
25 replicates per species would not be sufficiently large for estimating within species  
26 variance, and the effect of an outlier within a pool of two individuals would be considerable.  
27 Therefore, samples were pooled to minimize the effects of individual variation in mating  
28 behavior within each species. For all samples, Total RNA was extracted from brains using  
29 the TRIzol protocol (Invitrogen) following homogenization of brain tissue. RNA quality and  
30 concentration was determined using the Bioanalyzer (Agilent).

31

32 Voles: We used meadow voles (*M. pennsylvanicus*) that were 3<sup>rd</sup> and 4<sup>th</sup> generation  
33 descendants of those captured near Oshkosh, Wisconsin, USA. In this study, meadow  
34 voles were born and raised under a long photoperiod (14:10 h, L: D, lights on at 0700h  
35 CST). We weaned the voles at 19 days of age. We then housed them with littermates until  
36 34 days of age. When we separated littermates, we housed them individually in clear

37 plastic cages (27 x 16.5 x 12.5 cm, l x w x h) and then maintained the males and females  
38 in different rooms. For both species, on the day of euthanasia, each male vole was  
39 anesthetized with isoflurane and rapidly decapitated. Brains were removed and frozen on  
40 dry ice, then stored at -80° C.

41

42 Mice: Adult male and female *P. maniculatus* and *P. californicus* were obtained from the  
43 Peromyscus Genetic Stock Center (Univ. South Carolina, Columbia, SC). Caging, diet,  
44 and bedding were as previously described (3). For each species we created six male-  
45 female pairs. One week after pairing each mouse was lightly anesthetized with isoflurane  
46 and rapidly decapitated. Brains were removed and frozen on powdered dry ice.

47

48 Birds: Fieldwork was conducted in the Harghita region of Transylvania, Romania, to collect  
49 tissue from wild populations of water pipit, *Anthus spinoletta*, and dunnock, *Prunella*  
50 *modularis*, during their breeding season in May-June 2011 (under permit: Ministerial Order  
51 from the Rumanian government no. 1470/2011). Using song playback, four water pipits  
52 and five dunnocks (adult males) were lured into mist nests. Morphometric data was  
53 collected and collated for each bird. Birds were sacrificed by instantaneous decapitation  
54 within four minutes of capture to prevent stress-induced changes to circulating  
55 testosterone levels and gene expression (Deviche et al., 2010; Van Hout et al., 2010).  
56 Whole brains were dissected out, hindbrains were removed and the remaining material  
57 was finely chopped and placed in Eppendorf tubes free from DNA, DNase and RNase,  
58 and flooded with RNAlater to remove any air bubbles. Samples were stored on ice for  
59 between 8 and 12 hours, to allow the RNAlater to permeate the whole tissue (Applied  
60 Biosciences protocol, Ambion), before being stored at approximately -17°C for up to 10  
61 days before being frozen to -80°C.

62

63 Frogs: We sampled two species of dendrobatid frogs the monogamous *Ranitomeya*  
64 *imitator* and nonmonogamous *Oophaga pumilio*. *R. imitator* individuals were captive-bred  
65 F3s, approximately one year old, from a breeding colony originally collected in Chazuta,  
66 San Martin, Peru. Previous research by one of the authors (K. Summers) and his students  
67 on this population confirms monogamous behavior. Adult *R. imitator* males were  
68 purchased from Understory Enterprises (Chatham, ON, Canada) and were sacrificed upon  
69 arrival. Adult individuals of *O. pumilio* were captured in the field by hand on the island of  
70 Bastimentos, Bocas del Toro, Panama, and transferred to a breeding colony housed at  
71 Tulane University, New Orleans, USA. All individuals used in this study were housed with  
72 a female and successfully reared offspring in the captive colony prior to euthanasia and  
73 brain collection. Animals were euthanized by rapid cervical transection and brains were  
74 rapidly removed and immediately frozen on dry ice.

75

76 Fishes: We chose two sister species from the Ectodine cichlid clade of Lake Tanganyika,  
77 Africa: *Xenotilapia spiloptera*, a monogamous species with the male and female forming  
78 a pair bond and providing parental care, and the closely related *X. ornatipinnis*, a  
79 polygynous species in which only the females provide maternal care (6). Adult and  
80 sexually mature individuals (with large gonads with distinct and mature sperm packages)  
81 were captive-bred F2s, with *X. spiloptera* males engaged in a pair-bond and *X. ornatipinnis*  
82 males actively maintaining a territory. Animals were euthanized by rapid cervical  
83 transection, brains rapidly removed, and immediately frozen on dry ice.

84

### 85 **RNA sequencing and mapping**

86 Following hindbrain removal, RNA was extracted from fore- and midbrain tissue of  
87 reproductively active males using Trizol, according to the manufacturer's instructions. An  
88 aliquot of total RNA was then run on a Bioanalyzer Nano RNA chip (Agilent) to confirm

89 RNA integrity was above 7 for each sample. The three individuals within each species  
90 were then pooled in equal RNA amounts before extraction of polyadenylated RNA with  
91 the Poly A Purist kit (Ambion), according to manufacturer's instructions.

92  
93 RNA library preparation and sequencing was performed by the Genome Sequencing and  
94 Analysis Facility (GSAF) at the University of Texas. Library prep was done using the NEB  
95 small RNA kit (cat #E6160L or #E6160S) and sequencing was performed using Illumina  
96 HiSeq. Trimmomatic (7) was used to filter and trim reads using the following parameters:  
97 -phred33 ILLUMINACLIPadapters.fa:3:30:10 LEADING:3 TRAILING:3  
98 SLIDINGWINDOW:4:15 MINLEN:36, where adapters.fa is a fasta file containing a list of  
99 Illumina barcoded adapters. Transcriptomes were assembled *de novo* with Trinity. To  
100 reduce redundancy in the assembly, we ran cd-hit-est (parameters: -c 0.98) Reads were  
101 mapped to *de novo* assembled transcriptome using the Burrows-Wheeler Alignment tool  
102 (bwa-mem, 8). Raw reads for each gene were calculated as the sum of transcript counts  
103 obtained using SAMtools (9). Raw reads were normalized as reads per million (RPM).

104

### 105 **Orthology inference**

106 Within species pairs, contigs were annotated and gene orthology was defined by aligning  
107 assembled contigs and protein sequences of closely related reference genomes  
108 (mammals: *Rattus norvegicus*; birds: *Gallus gallus*; frogs: *Xenopus tropicalus*; fishes:  
109 *Oreochromis niloticus*) using BLAST (e-value = 1e-5). Genes that reciprocally BLAST to  
110 the clade-specific reference genome in both the monogamous and nonmonogamous  
111 species were called orthologous (number of orthologous genes in each clade: 11,051  
112 voles; 10,519 mice; 6993 birds; 7035 frogs; 13,135 fishes).

113

114 Clade specific gene loss and duplication events obscure the evolutionary history of genes,  
115 such that in many cases gene families will contain distinct numbers of paralogs in different  
116 clades. One solution is to focus on orthologous gene groups. We tested similarity in  
117 transcriptomic profiles of monogamous species across divergent vertebrate clades using  
118 orthologous gene group (OGG) expression patterns. OGGs were identified using the  
119 sequence based ortholog calling software package OrthoMCL (10). Protein sequences of  
120 the reference genomes (listed above) were organized into orthologous gene groups based  
121 on sequence similarity. For each reference genome, genes were grouped into orthologous  
122 gene groups (as paralogs) when sequence similarity was higher among genes within  
123 species than between species. This approach of ortholog calling improves substantially  
124 on reciprocal best BLAST hits, which results in loss of up to 60% of true orthologous  
125 relationships as it eliminates all paralogous genes (11). Alternatively, databases of OGGs  
126 (12, 13) are most useful for traditional model systems with well-sequenced and annotated  
127 genomes. Our method of ortholog calling by sequence similarity of target species using  
128 OrthoMCL (10) identified 1979 OGGs, while only 355 OGGs were identified using a  
129 database approach (eggNOG). While the remaining analysis characterizing monogamy-  
130 related gene-expression patterns focused on OrthoMCL OGGs, similar results were found  
131 when eggNOG OGGs were analyzed. Because our study focused on identifying  
132 monogamy-related expression patterns, and genes in the same OGG were generally  
133 concordant in directionality of expression differences (Fig. S2; Table S3), when an OGG  
134 contained more than one gene (i.e., paralogs: Fig. S2; voles: 573, 29.0%; mice: 521,  
135 28.3%; birds: 320, 16.2%; frogs: 227, 11.5%; fishes: 730, 36.9%) the gene with the highest  
136  $\log_2$  fold-difference between the monogamous and nonmonogamous species pairs was  
137 used for the remainder of the analysis. Similar overall patterns were obtained using the  
138 mean  $\log_2$  fold-differences for the orthologous gene groups.

139

140 **Differential Expression Analysis**

141 To assess concordance of OGG expression in monogamous species across clades we  
142 used the differential expression analysis software package DESeq2 (14). For each  
143 species, raw read counts for the 1979 OGGs identified across all species were included  
144 in the differential expression analysis. Species were labeled as monogamous or  
145 nonmonogamous such that species from distinct clades served as biological replicates in  
146 the analysis. DESeq2 was performed on different evolutionary sub-groups including  
147 mammals, amniotes, tetrapods, and all clades. OGGs with an expression difference of +/-  
148 1 log<sub>2</sub> fold-difference and p-value < 0.1 were characterized as differentially expressed.  
149 This fairly liberal cut off captures genes that are generally concordant in expression  
150 direction across clades that may otherwise be eliminated.

151

152 To extract patterns of gene expression shared among monogamous species across  
153 clades, we utilized a hypergeometric approach, the R package Rank-Rank  
154 Hypergeometric Overlap (RRHO) (15). In RRHO analysis, rank log<sub>2</sub> fold-differences in  
155 monogamous vs. nonmonogamous mRNA levels are binned into steps (we used the  
156 default settings which binned our 1979 OGGs into 45 steps). Each step can be set as a  
157 threshold making a continuous threshold scale of differential expression unique to each  
158 clade. At each pairwise log<sub>2</sub> fold-difference threshold (binned OGG step) enrichment of  
159 rank correlations between clades is determined using a hypergeometric distribution.  
160 RRHO corrects p-values for multiple comparisons using the B-Y procedure (16). Overall  
161 significance of rank correlations for each pairwise comparison of clades was calculated  
162 using permutation analysis (17).

163

164 **Novel candidates and GO analysis**

165 To identify the most robust candidate genes associated with a monogamous mating  
166 system across species, we combined the results of our differential gene expression  
167 analysis with the RRHO analysis (Fig. 4). Specifically, we identified genes that were  
168 concordantly differentially expressed (at +/- 1 log<sub>2</sub> fold-difference) between monogamous  
169 and nonmonogamous species in four of the five clades, and equivalently identified in at  
170 least five of the ten RRHO comparisons which allows one clade to lack concordant  
171 expression (Fig. 5; Dataset S1). To capture genes that are generally concordant in  
172 expression direction across clades, which may not be captured by threshold differential  
173 expression approaches, we used the more liberal expression cut off of +/- 1 log<sub>2</sub> fold-  
174 difference. Notably, these candidate genes have known roles in synaptic transmission,  
175 neuroplasticity, and neurological function among other functions possibly reflecting  
176 similarities among monogamous species in the mechanisms through which the brain  
177 reward circuitry becomes associated with social affiliation (e.g., reproductive and parental  
178 behavior). Several candidate genes are critical for neuronal development as well as  
179 synaptic function and plasticity, including: Low Density Lipoprotein Receptor-Related  
180 Protein 6 (*LRP6*) (18), the Wnt inhibitor Adenomatosis Polyposis Coli Down-Regulated 1  
181 (*APCDD1*) (19), the Lysophosphatidic Acid Receptor 1 (*LPAR1*) (20), and Notch1 (21).  
182 Relatedly, the candidate gene (*Dscam*) remodels microcircuitry through regulation of  
183 dendritic arborization (22), and in this way is also thought to enhance learning and memory  
184 (27). Two genes on the candidate list have documented roles in synaptic transmission.  
185 The excitatory neurotransmitter Metabotropic Glutamate Receptor 6 (*GRM6*) is the only  
186 known metabotropic glutamate receptor to directly mediate synaptic transmission in the  
187 nervous system (23). Huntingtin Interacting Protein (*Hip1*) regulates AMPA receptor  
188 trafficking (24) and, interestingly, also enhances androgen receptor-mediated transcription  
189 (25). Finally, candidate genes lysine methyltransferase 2C (*KMT2c*) (26) and solute carrier  
190 family 6 member 17 (*SLC6a17*) (27) are involved in cognitive function and cause



191 intellectual disability when mutated. Note that in mice, the candidate genes *Tnik*, *Lpar1*,  
192 *Man2a1*, and *Lrp6* predominantly show expression in the forebrain, whereas the remaining  
193 genes are either broadly distributed throughout the brain (28) or their brain expression has  
194 yet to be mapped.

195

196 To characterize similarity of function of monogamy-related OGGs across species we  
197 assessed concordance of over- and under-represented GO annotations using BiNGO  
198 (29). For each clade, enrichment of GO terms was assessed for OGGs up- or down-  
199 regulated at  $\log_2$  fold-difference  $\pm 1$  with the complete list of 1979 OGGs as the reference  
200 set. BiNGO uses a parent-child approach taking into account dependencies among GO  
201 terms. GO terms were identified as over- or under-represented using a hypergeometric  
202 test. p-values were then adjusted for multiple comparisons using Benjamini & Hochberg's  
203 FDR correction.

204

### 205 **Phylogenetic, life history, and gene expression distances**

206 As described above, we chose species pairs with similar ecological attributes (except for  
207 mating system characteristics) for each clade to control for the potential confounding  
208 effects of a species' natural history. For each species, we consulted the literature to score  
209 characteristics of mating system (i.e., presence of a pair bond, territoriality, and direct and  
210 indirect paternal care) and ecology (i.e., habitat complexity, activity patterns, diet, and  
211 gregariousness) (SI Appendix, Tables S1 and S2).

212

213 To assess the contribution of evolutionary history and mating system on neural gene  
214 expression, we compared evolutionary distance, and similarities in mating system  
215 characteristics to gene expression distance between all pairs (Fig. 6A and B). A mating  
216 system score was calculated for each species as the sum of the mating system

217 characteristics, where higher values indicate more elaborated monogamy (i.e., males  
218 consistently form pair bonds, provide both direct and indirect parental care, exhibit high  
219 levels of territoriality, and are less sexually dimorphic). We estimated evolutionary  
220 divergence between clades using TimeTree (30). For each clade, expression distance  
221 was estimated as the Euclidean distance in  $\log_2$  fold-difference of expression between the  
222 monogamous and nonmonogamous species (31). To remove the variation in gene  
223 expression and mating system characteristics due to phylogeny, we calculated  
224 phylogenetic independent contrast on the first principal component (PC) of gene  
225 expression and mating system score using the R package ape (32). In both the Euclidean  
226 distance comparisons (Fig. 6A and B) and the principal components analysis (PCA) (Fig.  
227 6C), we limited the OGGs to include only those that were differentially expressed ( $\pm 1 \log_2$   
228 fold difference in at least one clade) and variable (upper quartile of variance across all  
229 species). This subset included 401 OGGs that overlap significantly with candidate OGGs  
230 discovered using RRHO (overlap = 35, hypergeometric distribution  $p = 7.6e-07$ ) and  
231 differential expression analysis (overlap = 83, hypergeometric distribution  $p = 3.7e-13$ )  
232 (Fig. S7). A PCA including  $\log_2$ -transformed RPM for this subset of OGGs in all 10 species  
233 was performed using the prcomp function in R. PC1 described 22.8% of the variation in  
234 expression.

235

### 236 **Accessibility of Data and Data Analyses**

237 RNA sequencing data discussed in this publication have been deposited in NCBI's Gene  
238 Expression Omnibus (33) and are accessible through GEO Series accession number  
239 GSE123301 (<https://www.ncbi.nlm.nih.gov/geo/query/acc.cgi?acc=GSE123301>).

240 Additional data and data analyses scripts in R and Python are published and publically  
241 available as a dataverse at the Texas Data Repository  
242 (<https://dataverse.tdl.org/dataverse/monogamy>).

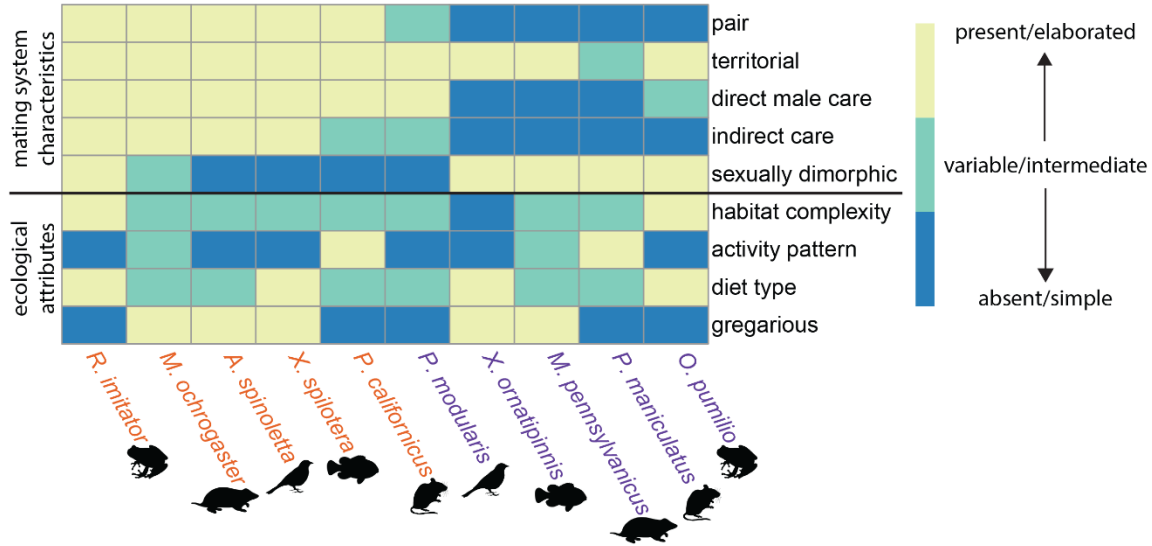

244

245 **Figure S1.** Ecological attributes and mating system characteristics of study species.

246 Species names in orange are the monogamous species, those in purple are the

247 nonmonogamous species for each clade. Color indicates presence or degree of trait

248 elaboration in that species unless otherwise indicated below. Yellow indicates the trait

249 listed on the right is absent or 'simple', green indicates intermediate, and blue indicates

250 present or 'elaborated'. Five mating system characteristics were scored, including: pair

251 bond formation, defense of breeding territories, male engagement in offspring

252 provisioning, cleaning, or transport, males actively defend nests or provision females, and

253 presence of sexual dimorphism (size or color elaboration). Four additional ecological

254 attributes were also scored, including: habitat complexity (simple = yellow,

255 various/intermediate = green, or complex environments = blue), activity pattern (diurnal =

256 yellow, crepuscular/seasonally variable = green, and nocturnal = blue), diet type (primary

257 diet is "herbivorous" = yellow, "omnivorous" = green, and "carnivorous" = blue), and

258 whether communal or gregarious behaviors are observed outside of a reproductive

259 context. Details and references in (SI Appendix, Tables S2 and S3).

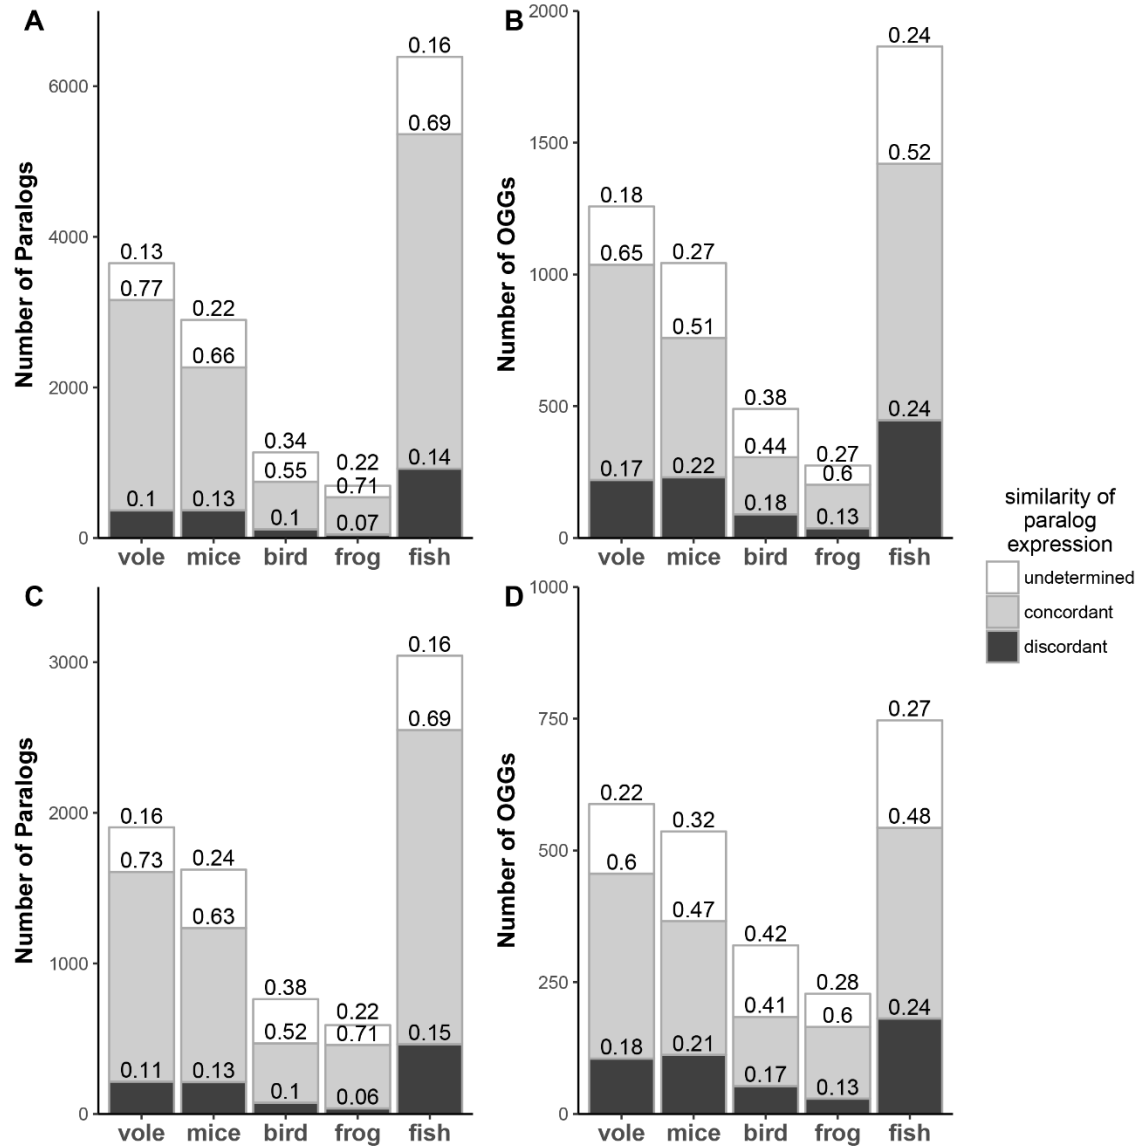

260

261 **Figure S2.** To compare neural gene expression across all clades, genes were grouped  
 262 into orthologous gene groups (OGGs) using orthoMCL. OrthoMCL identified 6125 OGGs  
 263 shared across the rat, chicken, frog, and tilapia reference genomes. Of those, 44-76%  
 264 were identified using RNAseq (Table S3). Due to variation in paralog identification,  
 265 different numbers of genes were included for each clade (voles: 7540, mice: 7046, birds:  
 266 4914, frogs: 3703, fish: 10154) (Table S3). 1979 OGGs were shared across all clades  
 267 with different numbers of paralogs in each clade (Table S4). We assess the concordance  
 268 in paralog expression at the gene (A and C) and OGG (B and D) levels for all clade-specific

269 OGGs (A and B) and for OGGs shared across clades (C and D). Paralogs are generally  
270 concordant in expression direction between the monogamous and nonmonogamous  
271 species (i.e. higher or lower expression). The paralog with the largest fold-difference in  
272 expression between the monogamous and nonmonogamous species pairs was selected  
273 as the representative gene for each OGG. If this value was  $< \pm 1 \log_2$  fold-difference the  
274 OGG and its containing paralogs were labeled at “undetermined” (white; all plots). The  
275 number of paralogs directionally discordant from the representative gene are shown for  
276 each clades (black; A and C). Any OGG containing a discordant paralog is considered  
277 discordant (black; B and D). The number of concordant paralogs and OGGs are shown in  
278 grey. Values at the boundaries indicate the proportion of paralogs (A and C) or OGGs  
279 containing paralogs (B and D).

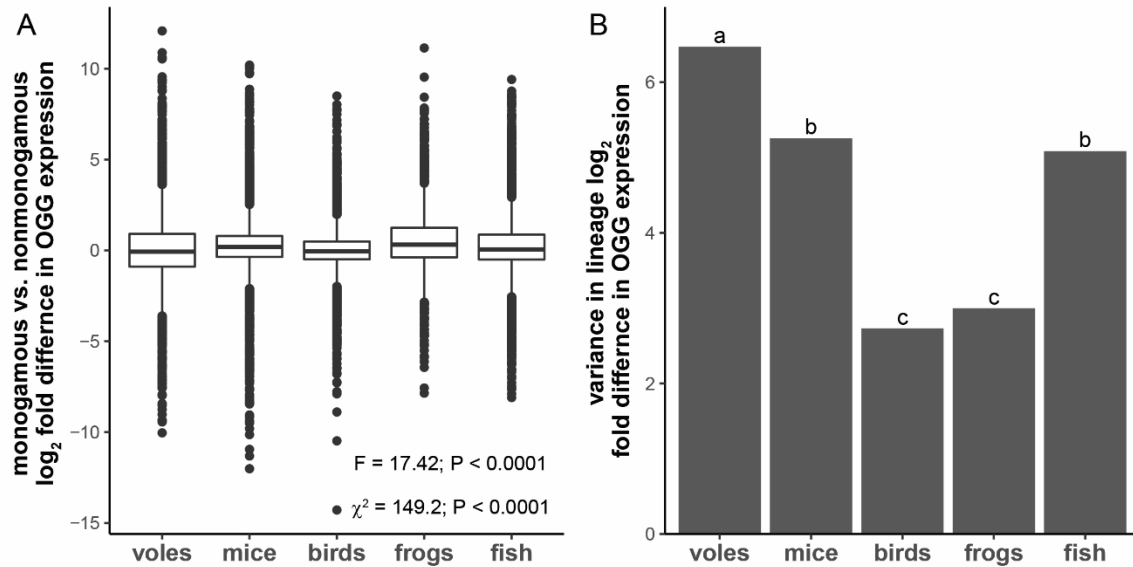

280

281 **Figure S3.** Log<sub>2</sub> fold difference (monogamous vs. nonmonogamous) in orthologous gene  
 282 group (OGG) expression for all 1979 orthologous gene groups in each clade (A). Variance  
 283 in log<sub>2</sub> fold-difference (monogamous vs. nonmonogamous) in OGG expression (B). When  
 284 more than one gene is present in an orthologous gene group the gene with the highest  
 285 log<sub>2</sub> fold-difference was selected. Log<sub>2</sub> fold-difference in OGG expression in monogamous  
 286 species is slightly skewed toward increased expression in mice and frogs (median = 0.19  
 287 and 0.31, respectively). Birds and frogs exhibit the smallest variance (B) and narrowest  
 288 interquartile range of expression differences (A) between monogamous and  
 289 nonmonogamous species. Overall, means (Kruskall-Wallis  $\chi^2$ ) and variances (Levene's  
 290 test) differ among the clades. F-tests for equality of variances were used to compare  
 291 variances for all pairwise clades. Clades separated by letters significantly differ after  
 292 correcting p values for multiple hypothesis testing (p \* number of comparisons).

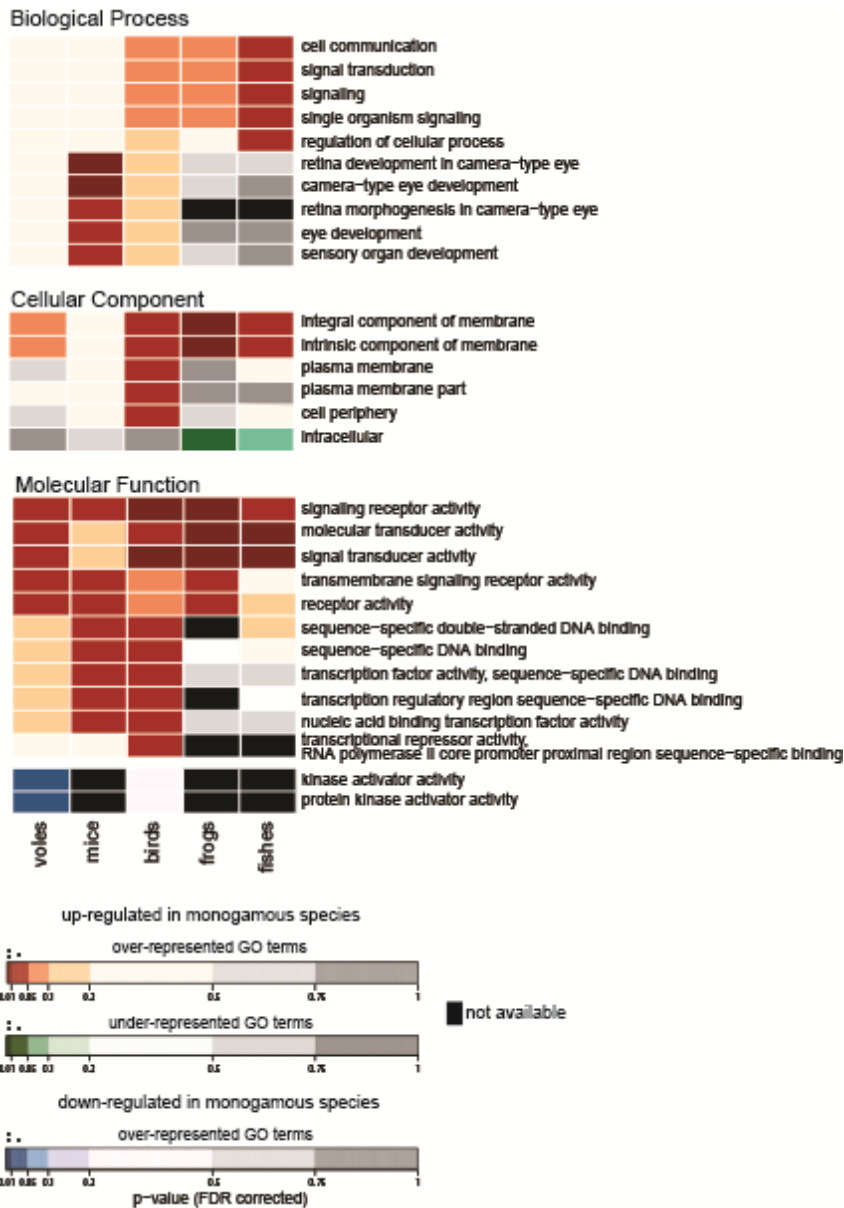

293

294 **Figure S4.** To characterize similarity of function of monogamy-related orthologous gene  
 295 groups (OGGs) across species we assessed concordance of over- and under-represented  
 296 GO annotations using BiNGO (29). For each clade, enrichment of GO terms was assessed  
 297 for OGGs up- or down-regulated at  $\log_2$  fold-difference  $\pm 1$  with the complete list of 1979  
 298 OGGs as the reference set.

299

300

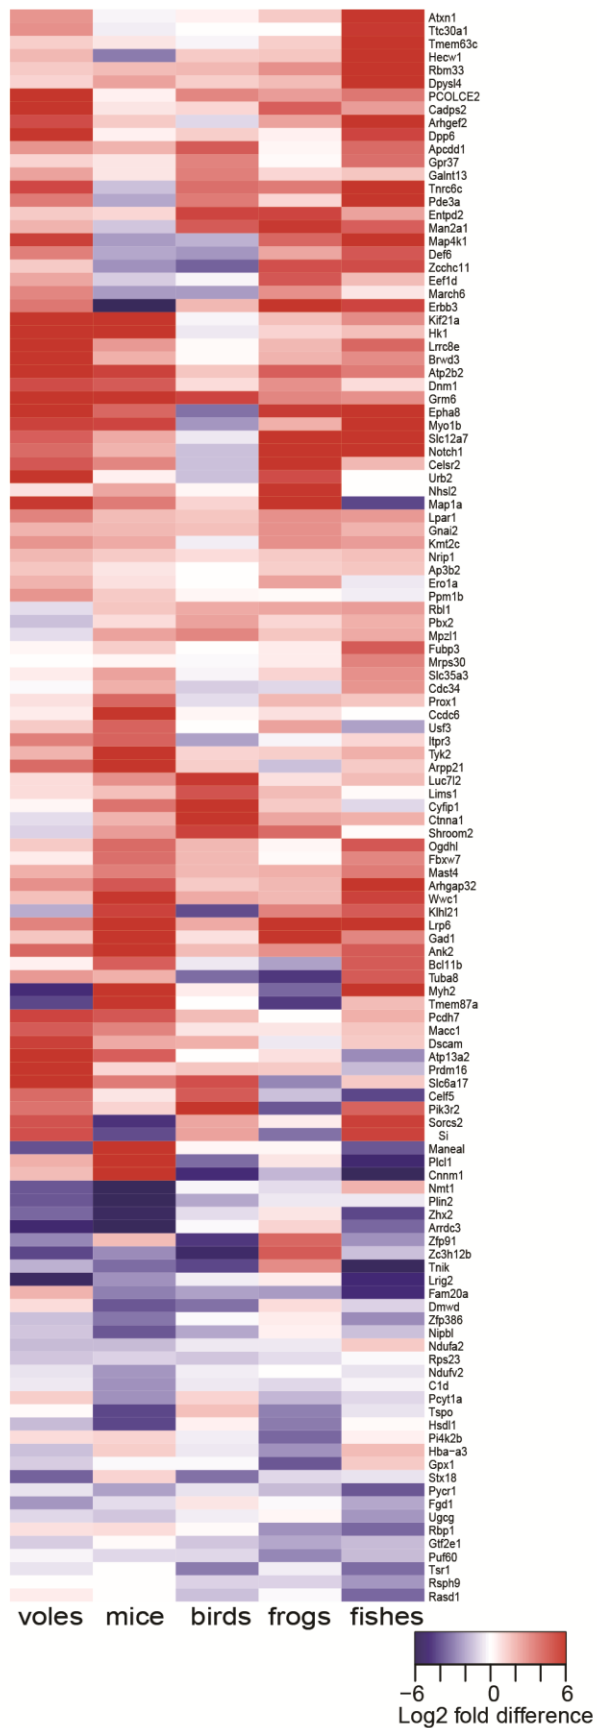



302 **Figure S5.** Genes concordantly expressed in monogamous brains across vertebrates.  
303 121 genes were identified with DESeq2  $\log_2$  fold-difference  $\pm 1$  and p-value  $< 0.1$ .  
304 DESeq2 provides a base mean and a  $\log_2$  fold-difference. As with any other analysis with  
305 replicates, not all replicates are expected to show the same directional difference in gene  
306 expression. However, on average, these 121 OGGs are differentially expressed between  
307 monogamous and nonmonogamous species across all clades. Gene symbols are  
308 provided.

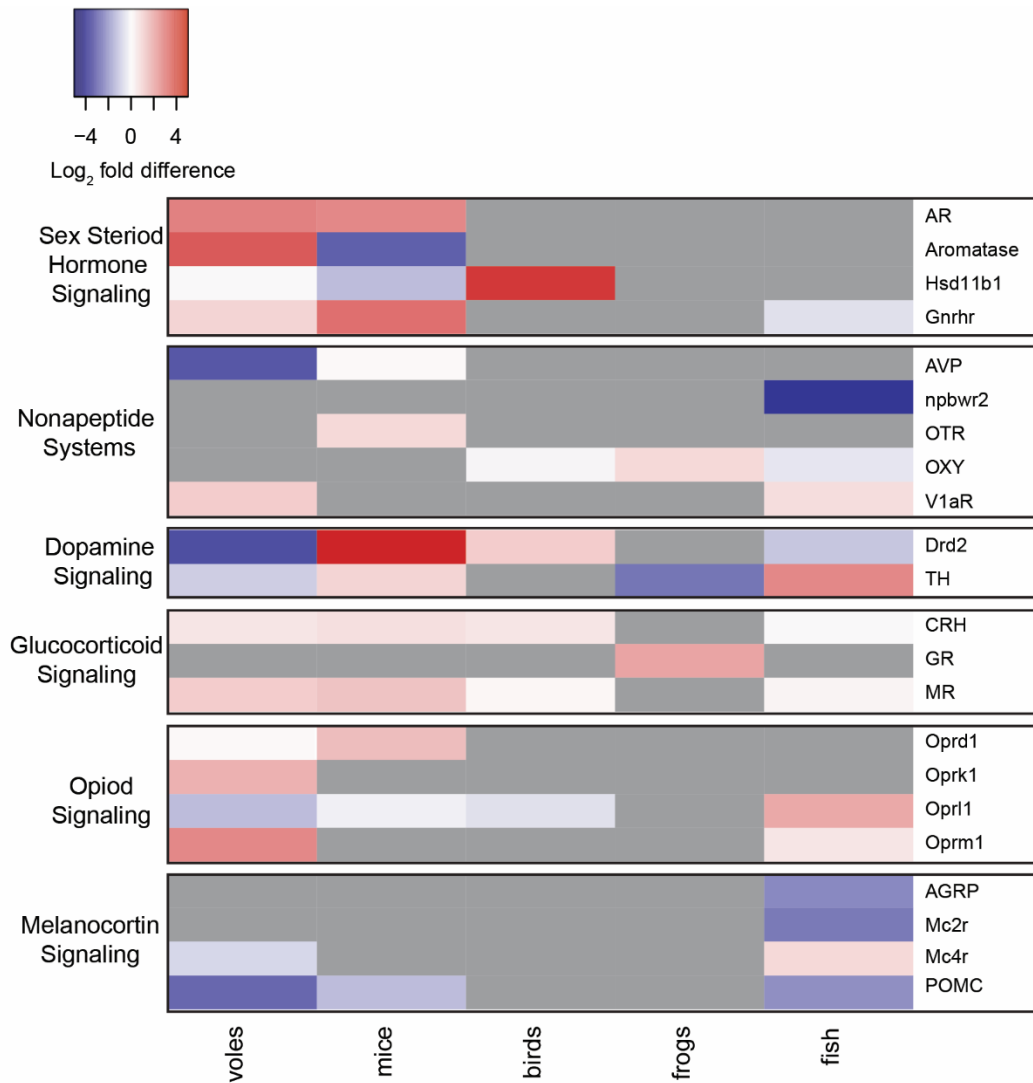

309

310 **Figure S6.** Relative expression (log<sub>2</sub> fold-difference) in monogamous versus  
 311 nonmonogamous species of each clade for 22 candidate genes previously implicated in  
 312 regulating complex social behavior across vertebrates. These often studied candidate  
 313 genes represent six neuroendocrine and neuro-modulatory systems that have previously  
 314 implicated in the regulation of (aspects of) monogamous behavior or, more generally,  
 315 complex social behavior. Reds (from light to dark) indicate increased expression in the  
 316 monogamous species; blues (from light to dark) indicate decreased expression in the  
 317 monogamous species. Grey indicates that expression data was not available for one or  
 318 both species of that clade. Note that in several clades many of these candidate genes

319 were not detected in either the RNAseq analysis or during the orthology inference step,  
320 therefore limiting the interpretability of these data.  
321

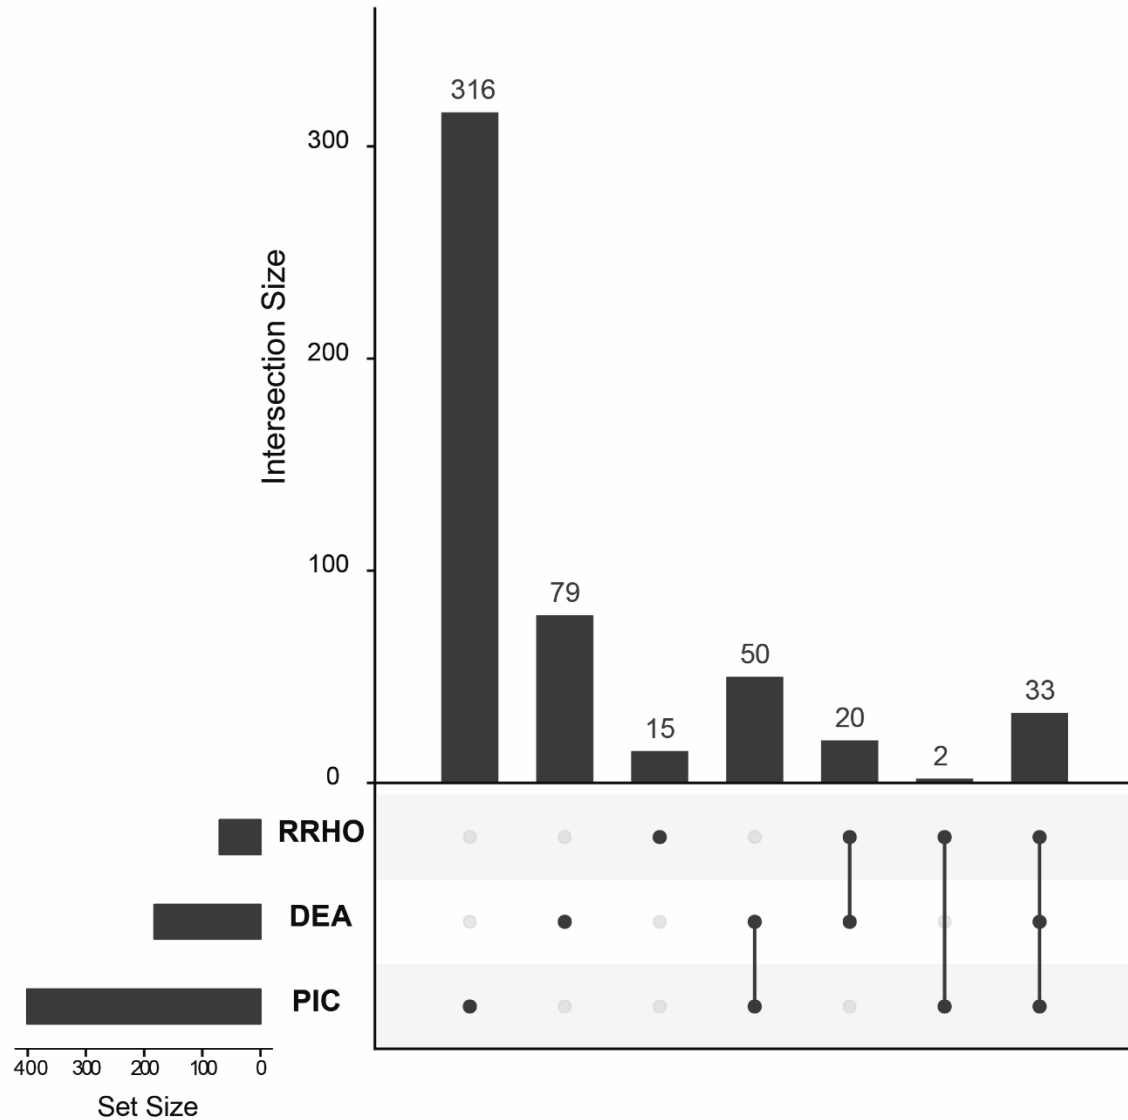

322

323 **Figure S7.** 401 OGGs exhibit both differential expression between the monogamous  
 324 and nonmonogamous species in at least one clade (at +/- 1 log<sub>2</sub> fold difference) and  
 325 high expression (RPM) variance across all species (variance in the upper quartile). This  
 326 subset included 401 OGGs used in the phylogenetic independent contrast (PIC) overlap  
 327 significantly with 70 OGGs identified by RRHO (overlap = 35, hypergeometric distribution  
 328  $p = 7.6e-07$ ) and 182 OGGs identified using differential expression analysis (overlap =  
 329 83, hypergeometric distribution  $p = 3.7e-13$ ). Intersections were identified and plotted  
 330 using the R package UpSetR (34). P-values are corrected for multiple hypothesis

331 testing. RRHO candidate OGGs are among the most up- or the most- down-regulated in  
332 6 of the 10 comparisons (as in Fig. 5). DEA candidate OGGs include those identified  
333 with DESeq2 across all vertebrates ( $\log_2$  fold-difference  $\pm 1$  and p-value  $< 0.1$ ) or those  
334 that exhibit a  $\pm 1 \log_2$  fold expression difference between the monogamous and  
335 nonmonogamous species in at least four clades (as in Fig. S5 and Fig. 5, respectively).  
336

337

**Table S1.** Mating system characteristics of each species used.

| <b>species</b>           | <b>pair bond</b>                         | <b>territorial</b>                                                                | <b>paternal offspring care</b>                                     | <b>indirect paternal care</b>                         | <b>sexually dimorphic</b>                                             |
|--------------------------|------------------------------------------|-----------------------------------------------------------------------------------|--------------------------------------------------------------------|-------------------------------------------------------|-----------------------------------------------------------------------|
| <i>M. ochrogaster</i>    | Yes (35, 36)                             | Yes (36, 37)                                                                      | Yes (38)(39)                                                       | Yes (40, 41)                                          | Various (3, No: 8, Yes: in the lab: 9)                                |
| <i>M. pennsylvanicus</i> | No (44)                                  | Yes (45, 46)                                                                      | No (41)                                                            | No (41)                                               | Yes (47)                                                              |
| <i>P. californicus</i>   | Yes (48, 49)                             | Yes: <i>highly</i> aggressive and territorial (50, overlapping territories: , 51) | Yes (52–54)                                                        | Yes (55–58)                                           | No (most sources say no;but, brain regions are sexually dimorphic 59) |
| <i>P. maniculatus</i>    | No (60, 61)                              | Yes: much less so than <i>P. californicus</i> (62, 63)                            | No (64, 65) (note: pup licking/nest sitting reported in one study) | No (no reports)                                       | Yes (43)                                                              |
| <i>A. spinoletta</i>     | Variable (86%: 66)                       | Yes (66)                                                                          | Yes (67)                                                           | Yes: alarm calling, feeding & incubating females (66) | No (66)                                                               |
| <i>P. modularis</i>      | Variable depending on space use (68, 69) | Yes: mate guarding (70)                                                           | Yes: provisioning (70)                                             | Sometimes (71)                                        | No (72)                                                               |
| <i>R. imitator</i>       | Yes (73, 74)                             | Yes (73)                                                                          | Yes: egg attendance; tadpole feeding and transport (75)            | Yes (73)                                              | Yes: (females are slightly, but significantly larger 73)              |
| <i>O. pumilio</i>        | No (76, 77)                              | Yes (76, 78)                                                                      | Yes: intermediate: periodic water shedding (79)                    | No (80)                                               | Yes: (females larger than males, C. Richards-Zawacki pers. obs.)      |
| <i>X. spilotera</i>      | Yes (81)                                 | Yes (81)                                                                          | Yes (81, 82)                                                       | Yes (81)                                              | No (HAH pers. obs.)                                                   |
| <i>X. ornatipinnis</i>   | No (82)                                  | Yes: 'roving territories' (HAH pers. obs.)                                        | No (82)                                                            | No (82)                                               | Yes: chin pigmentation in males (HAH pers. obs.)                      |

338

339

**Table S2.** Ecological attributes of the study species.

| <b>species</b>           | <b>habitat complexity</b>                                                                       | <b>activity</b>                                | <b>diet</b>                                                                           | <b>communal/gregarious outside of breeding</b>                  |
|--------------------------|-------------------------------------------------------------------------------------------------|------------------------------------------------|---------------------------------------------------------------------------------------|-----------------------------------------------------------------|
| <i>M. ochrogaster</i>    | Intermediate: un-grazed grassland/savanna (37)                                                  | Various, seasonal (83)                         | Omnivorous: forbs, foliage, fruits, tubers, insects (84, 85)                          | Yes: communal group living (86, 87)                             |
| <i>M. pennsylvanicus</i> | Intermediate: grasslands, woodlands, riparian (88)                                              | Various depending on landscape and season (89) | Omnivorous: grasses, foliage, fruits, tubers, insects (89, 90)                        | Yes: communal nesting in winter populations (91, 92)            |
| <i>P. californicus</i>   | Intermediate: dense chaparral/broad-sclerophyll woodland (48)                                   | Nocturnal (93)                                 | Omnivorous: acorns, flowers seeds, fungi and arthropods (94)                          | No: non-overlapping territories (51)                            |
| <i>P. maniculatus</i>    | Various (95)                                                                                    | Nocturnal (96)                                 | Omnivorous: mostly insects & arthropods, but also seeds, flowers, and leaves (63, 97) | No (62, 63)                                                     |
| <i>A. spinoletta</i>     | Intermediate: open, heterogeneous habitats: shrub lands, medium woodlands, wet inlands (98, 99) | Diurnal                                        | Omnivorous: mostly insects and seeds (100)                                            | Yes: feeds in large groups outside of the breeding season (101) |
| <i>P. modularis</i>      | Intermediate: woodlands, hedgerows, gardens                                                     | Diurnal                                        | Omnivorous: mostly insects and seeds (102)                                            | No: solitary in winter (103)                                    |
| <i>R. imitator</i>       | Complex: leaf litter, secondary to old growth forest (73)                                       | Diurnal                                        | Carnivorous: ants, mites, beetles (A. Stuckert, pers. obs.)                           | No (K. Summers pers. obs.)                                      |
| <i>O. pumilio</i>        | Complex: premontane forest leaf litter                                                          | Diurnal (104)                                  | Carnivorous: ants, mites, beetles, springtails (105, 106)                             | No; (76–78)                                                     |
| <i>X. spilotera</i>      | Intermediate (82, 107)                                                                          | Diurnal (HAH pers. obs.)                       | Carnivorous (108)                                                                     | Yes (82, 108)                                                   |
| <i>X. ornatipinnis</i>   | Simple, sand (82)                                                                               | Diurnal (HAH pers. obs.)                       | Carnivorous (108)                                                                     | Yes (82, 108)                                                   |

343 **Table S3.** For each species, the number of genes and orthologous gene groups (OGGs)  
 344 are shown. For each clade the number of shared genes and OGGs are shown. For each  
 345 evolutionary group (i.e., mammals, amniotes, tetrapods, and vertebrates) the number of  
 346 shared OGGs is shown. The starting set is limited to 6125 orthologous OGGs identified  
 347 by orthoMCL as containing genes from each of references genome used in this study (i.e.,  
 348 rat, chicken, *Xenopus*, and tilapia).

349

| Species                  | Genes | OGGs | clade genes | clade OGGs      | mammal OGGs     | amniote OGGs    | tetrapod OGGs   | vertebrate OGGs |
|--------------------------|-------|------|-------------|-----------------|-----------------|-----------------|-----------------|-----------------|
| <i>M. ochrogaster</i>    | 9733  | 6007 | 7840        | 5449<br>(0.890) | 4746<br>(0.775) | 3508<br>(0.573) | 2081<br>(0.340) | 1979<br>(0.323) |
| <i>M. pennsylvanicus</i> | 8088  | 5555 |             |                 |                 |                 |                 |                 |
| <i>P. californicus</i>   | 7936  | 5578 | 7046        | 5193<br>(0.839) | 4746<br>(0.775) | 3508<br>(0.573) | 2081<br>(0.340) | 1979<br>(0.323) |
| <i>P. manipulatus</i>    | 8298  | 5679 |             |                 |                 |                 |                 |                 |
| <i>A. spinoletta</i>     | 5378  | 4914 | 4914        | 4267<br>(0.697) | 4746<br>(0.775) | 3508<br>(0.573) | 2081<br>(0.340) | 1979<br>(0.323) |
| <i>P. modularis</i>      | 6441  | 5378 |             |                 |                 |                 |                 |                 |
| <i>R. imitator</i>       | 6170  | 5035 | 3703        | 3284<br>(0.536) | 4746<br>(0.775) | 3508<br>(0.573) | 2081<br>(0.340) | 1979<br>(0.323) |
| <i>O. pumilio</i>        | 4895  | 4098 |             |                 |                 |                 |                 |                 |
| <i>X. spiloptera</i>     | 11296 | 5889 | 10154       | 5628<br>(0.919) | 4746<br>(0.775) | 3508<br>(0.573) | 2081<br>(0.340) | 1979<br>(0.323) |
| <i>X. ornatipinnis</i>   | 11401 | 5882 |             |                 |                 |                 |                 |                 |

350

351

352



353 **Table S4.** For the 1979 orthologous gene groups (OGGs) shared among the clades  
 354 compared, we show the total numbers and proportions of genes, genes with paralogs, and  
 355 paralogs with directionally concordant, discordant, and undetermined expression for each  
 356 clade. In addition, we show the number and proportion of OGGs containing paralogs and  
 357 OGGs containing directionally concordant, discordant, undetermined paralogs. The  
 358 paralog with the largest fold-difference in expression between the monogamous and  
 359 nonmonogamous species pairs was selected as the representative gene for each OGG.  
 360 If this value was  $< \pm 1 \log_2$  fold-difference the OGG and its containing paralogs were  
 361 labeled as “undetermined.”

362

| Clade | genes | total paralogs (proportion of genes) | Paralogs (proportion of paralogs) |            |              | OGGs with paralogs (proportion of OGGs) | OGGs (proportion of OGGs with paralogs) |            |              |
|-------|-------|--------------------------------------|-----------------------------------|------------|--------------|-----------------------------------------|-----------------------------------------|------------|--------------|
|       |       |                                      | concordant                        | discordant | undetermined |                                         | concordant                              | discordant | undetermined |
| voles | 3294  | 1903 (0.58)                          | 1392 (0.73)                       | 215 (0.11) | 296 (0.16)   | 588 (0.30)                              | 351 (0.60)                              | 105 (0.18) | 132 (0.22)   |
| mice  | 3066  | 1623 (0.53)                          | 1023 (0.63)                       | 212 (0.13) | 388 (0.24)   | 536 (0.27)                              | 254 (0.47)                              | 112 (0.21) | 170 (0.32)   |
| birds | 2421  | 762 (0.31)                           | 395 (0.52)                        | 74 (0.10)  | 293 (0.38)   | 320 (0.16)                              | 131 (0.41)                              | 53 (0.17)  | 136 (0.43)   |
| frogs | 2341  | 590 (0.25)                           | 421 (0.71)                        | 37 (0.06)  | 132 (0.22)   | 228 (0.12)                              | 136 (0.60)                              | 29 (0.13)  | 63 (0.28)    |
| fish  | 4275  | 3043 (0.71)                          | 2087 (0.69)                       | 463 (0.15) | 493 (0.16)   | 747 (0.38)                              | 362 (0.48)                              | 181 (0.24) | 204 (0.27)   |

363

364

365 **Table S5.** For each clade, taxon median divergence time estimates and references are  
 366 reported from the TimeTree Database (109). No data is available in the TimeTree  
 367 Database for *Xenotilapia spiloter*a. References used to estimate divergence time between  
 368 the *Xenotilapia* species are provided.  
 369

| <b>Taxon A</b>           | <b>Taxon B</b>         | <b>divergence time median (MYA)</b> | <b>References:</b>       |
|--------------------------|------------------------|-------------------------------------|--------------------------|
| <i>M. pennsylvanicus</i> | <i>M. ochrogaster</i>  | 10.5                                | (110–113)                |
| <i>P. maniculatus</i>    | <i>P. californicus</i> | 11.5                                | (110, 111, 113, 114)     |
| <i>Peromyscus</i>        | <i>Microtus</i>        | 18.9                                | (110, 111, 113, 115–120) |
| <i>P. modularis</i>      | <i>A. spinoletta</i>   | 29                                  | (121–127)                |
| <i>O. pumilio</i>        | <i>R. imitator</i>     | 34.2                                | (128, 129)               |
| <i>X. ornatipinnis</i>   | <i>X. spiloter</i> a   | 2.5                                 | (6, 130)                 |

370

371 **Table S6.** Maximum, mean, and median  $-\text{Log}_{10}$  p-values for each quadrant of the Rank  
 372 Rank Hypergeometric Overlap analysis (Fig. 4).

| clade A | clade B | Concordant  |       | Discordant |         |
|---------|---------|-------------|-------|------------|---------|
|         |         | Downs       | Ups   | Down,Up    | Up,Down |
|         |         | Max Pvalues |       |            |         |
| voles   | mice    | 35.41       | 6.21  | 15.70      | 6.61    |
| voles   | birds   | 1.71        | 0.00  | 0.00       | 0.00    |
| voles   | frogs   | 22.33       | 18.05 | 20.06      | 12.35   |
| voles   | fish    | 22.54       | 3.40  | 8.33       | 6.07    |
| mice    | birds   | 7.52        | 10.02 | 0.27       | 5.23    |
| mice    | frogs   | 14.84       | 14.17 | 14.84      | 13.36   |
| mice    | fish    | 16.95       | 4.98  | 9.93       | 9.55    |
| birds   | frogs   | 7.91        | 2.22  | 8.11       | 0.00    |
| birds   | fish    | 5.81        | 5.43  | 0.21       | 0.00    |
| frogs   | fish    | 16.72       | 6.42  | 8.07       | 14.46   |

**Mean Pvalues**

|       |       |       |      |      |      |
|-------|-------|-------|------|------|------|
| voles | mice  | 12.10 | 0.18 | 1.52 | 0.35 |
| voles | birds | 0.17  | 0.00 | 0.00 | 0.00 |
| voles | frogs | 10.48 | 2.24 | 6.51 | 0.94 |
| voles | fish  | 8.36  | 0.16 | 0.39 | 0.35 |
| mice  | birds | 1.88  | 0.51 | 0.00 | 0.22 |
| mice  | frogs | 5.27  | 0.84 | 3.18 | 0.83 |
| mice  | fish  | 6.52  | 0.26 | 0.45 | 0.86 |
| birds | frogs | 2.54  | 0.09 | 2.38 | 0.00 |
| birds | fish  | 1.10  | 0.59 | 0.00 | 0.00 |
| frogs | fish  | 7.14  | 0.28 | 0.26 | 3.82 |

**Median Pvalues**

|       |       |       |      |      |      |
|-------|-------|-------|------|------|------|
| voles | mice  | 11.51 | 0.00 | 0.00 | 0.00 |
| voles | birds | 0.00  | 0.00 | 0.00 | 0.00 |
| voles | frogs | 11.27 | 0.00 | 4.89 | 0.00 |
| voles | fish  | 7.67  | 0.00 | 0.00 | 0.00 |
| mice  | birds | 0.93  | 0.00 | 0.00 | 0.00 |
| mice  | frogs | 5.38  | 0.00 | 0.00 | 0.00 |
| mice  | fish  | 6.02  | 0.00 | 0.00 | 0.00 |
| birds | frogs | 2.29  | 0.00 | 1.28 | 0.00 |
| birds | fish  | 0.01  | 0.00 | 0.00 | 0.00 |
| frogs | fish  | 7.29  | 0.00 | 0.00 | 3.31 |

373

374 **Table S7.** Expression of novel candidate genes in monogamous vs. nonmonogamous  
 375 species pairs.

| Symbol   | Name                                                               | Protein ID         | voles  | mice   | birds      | frogs      | fishes |
|----------|--------------------------------------------------------------------|--------------------|--------|--------|------------|------------|--------|
| Ank2     | Ankyrin 2                                                          | ENSRNOP00000015386 | 4.087  | 10.012 | 1.705      | 2.900      | 4.523  |
| Apccd1   | Adenomatosis Polyposis Coli Down-Regulated 1                       | ENSRNOP00000059242 | 2.816  | 2.005  | 4.526      | 0.280      | 3.987  |
| Arhgap32 | neuron-associated GTPase-activating protein                        | ENSRNOP00000011589 | 2.884  | 4.567  | 1.352      | 1.857      | 6.610  |
| Arpp21   | cAMP-regulated phosphoprotein 21                                   | ENSRNOP00000039268 | 4.021  | 6.166  | 1.201      | -<br>1.366 | 1.422  |
| Atp2b2   | ATPase Plasma Membrane Ca2+ Transporting 2                         | ENSRNOP00000060489 | 6.414  | 5.284  | 1.473      | 4.378      | 3.593  |
| Brwd3    | Bromodomain And WD Repeat Domain Containing 3                      | ENSRNOP00000050434 | 7.942  | 2.055  | 0.219      | 1.974      | 3.062  |
| Ctnna1   | Catenin Alpha 1                                                    | ENSRNOP00000008041 | -0.745 | 1.964  | 7.495      | 2.321      | 2.102  |
| Dpysl4   | Dihydropyrimidinase Like 4                                         | ENSRNOP00000029334 | 1.187  | 2.449  | 1.260      | 1.791      | 6.443  |
| Dscam    | Down Syndrome Cell Adhesion Molecule ( cell adhesion, PAK pathway) | ENSRNOP00000022476 | 5.447  | 2.189  | 2.064      | -<br>0.492 | 1.439  |
| Entpd2   | Ectonucleoside Triphosphate Diphosphohydrolase 2                   | ENSRNOP00000018560 | 1.372  | 1.009  | 5.261      | 5.266      | 2.429  |
| Epha8    | Ephrin Receptor A8                                                 | ENSRNOP00000017559 | 7.482  | 4.169  | -<br>3.140 | 5.547      | 8.402  |
| ErbB3    | Erb-B2 Receptor Tyrosine Kinase 3                                  | ENSRNOP00000006796 | 3.671  | -6.491 | 1.806      | 6.163      | 5.232  |
| Fam20a   | Golgi associated secretory pathway pseudokinase                    | ENSRNOP00000005367 | 1.991  | -2.827 | -<br>2.156 | -<br>2.273 | -4.851 |
| Gad1     | Glutamate Decarboxylase 1                                          | ENSRNOP00000000008 | 1.527  | 5.965  | 0.826      | 6.420      | 3.232  |
| Galnt13  | Polypeptide N-Acetylgalactosaminyltransferase 13                   | ENSRNOP00000042772 | 2.470  | 0.680  | 3.471      | 1.022      | 1.471  |
| Gnai2    | G Protein Subunit Alpha I2                                         | ENSRNOP00000022550 | 1.970  | 1.918  | 1.588      | 2.919      | 1.963  |
| Grm6     | Glutamate Receptor, Metabotropic 6                                 | ENSRNOP00000000249 | 7.102  | 5.860  | 5.261      | 3.171      | 2.965  |
| Gtf2e1   | General Transcription Factor IIE Subunit 1                         | ENSRNOP00000039601 | -1.125 | 0.230  | -<br>1.319 | -<br>1.967 | -1.547 |
| Hecw1    | HECT, C2 and WW domain containing E3 ubiquitin protein ligase 1    | ENSRNOP00000021703 | 1.867  | -2.903 | 1.384      | 1.530      | 7.697  |
| Kif21a   | member of the KIF4 subfamily of kinesin-like motor proteins        | ENSRNOP00000044677 | 9.344  | 6.399  | -<br>0.358 | 1.606      | 3.096  |
| Kmt2c    | lysine methyltransferase 2C                                        | ENSRNOP00000063937 | 2.764  | 2.171  | -<br>0.394 | 2.958      | 2.552  |
| Lpar1    | Lysophosphatidic Acid Receptor 1                                   | ENSRNOP00000043652 | 3.300  | 1.765  | 1.453      | 2.904      | 2.723  |
| Lrp6     | Low Density Lipoprotein Receptor-Related Protein 6                 | ENSRNOP00000063261 | 3.250  | 6.296  | 2.258      | 7.213      | 5.889  |

**Table S7 cont.**

| Symbol  | Name                                                                 | Protein ID         | voles  | mice   | birds      | frogs      | fishes |
|---------|----------------------------------------------------------------------|--------------------|--------|--------|------------|------------|--------|
| Lrrc8e  | Leucine-Rich Repeat<br>Containing 8 Family Member E                  | ENSRNOP00000037487 | 10.538 | 2.713  | 0.229      | 1.823      | 4.147  |
| Man2a1  | Mannosidase Alpha Class 2A<br>Member 1                               | ENSRNOP00000020767 | 1.935  | -1.249 | 4.456      | 5.717      | 4.381  |
| Mast4   | Microtubule Associated<br>Serine/Threonine Kinase Family<br>Member 4 | ENSRNOP00000067460 | 2.129  | 3.461  | 1.890      | 2.117      | 3.578  |
| Mpz11   | Myelin Protein Zero Like 1                                           | ENSRNOP00000004376 | -0.798 | 2.453  | 3.194      | 1.492      | 2.185  |
| Myo1b   | Myosin IB                                                            | ENSRNOP00000059455 | 5.353  | 5.197  | -<br>2.363 | 2.059      | 6.865  |
| Notch1  | Notch 1                                                              | ENSRNOP00000026212 | 4.015  | 2.024  | -<br>1.424 | 6.514      | 7.403  |
| Nrip1   | Nuclear Receptor Interacting<br>Protein 1                            | ENSRNOP00000002152 | 1.877  | 1.387  | 0.907      | 1.376      | 1.594  |
| Ogdhl   | Oxoglutarate Dehydrogenase<br>Like                                   | ENSRNOP00000027054 | 1.426  | 4.064  | 1.805      | 0.325      | 4.619  |
| Pcdh7   | Protocadherin 7                                                      | ENSRNOP00000042179 | 5.270  | 4.670  | 1.758      | 0.104      | 2.097  |
| PCOLCE2 | procollagen C-endopeptidase<br>enhancer 2                            | ENSRNOP00000067519 | 6.402  | 0.408  | 3.162      | 2.589      | 3.690  |
| Pik3r2  | Phosphoinositide-3-Kinase<br>Regulatory Subunit 2                    | ENSRNOP00000026210 | 3.727  | 1.128  | 8.494      | -<br>3.772 | 4.228  |
| Rbl1    | RB Transcriptional Corepressor<br>Like 1                             | ENSRNOP00000063017 | -0.752 | 1.504  | 2.227      | 2.291      | 2.525  |
| Rbm33   | RNA Binding Motif Protein 33                                         | ENSRNOP00000030808 | 1.344  | 1.766  | 1.825      | 2.909      | 8.013  |
| Slc12a7 | Solute Carrier Family 12<br>Member 7                                 | ENSRNOP00000022635 | 4.439  | 2.250  | -<br>0.550 | 5.992      | 8.764  |
| Slc6a17 | Solute Carrier Family 6 Member<br>17                                 | ENSRNOP00000065179 | 9.553  | 3.581  | 4.832      | -<br>2.679 | 1.371  |
| Tnik    | TRAF2 and NCK interacting<br>kinase                                  | ENSRNOP00000016799 | -1.729 | -3.351 | -<br>4.096 | 3.004      | -5.800 |
| Tnrc6c  | Trinucleotide Repeat Containing<br>6B                                | ENSRNOP00000049430 | 5.153  | -1.430 | 3.906      | 3.512      | 5.937  |
| Tyk2    | Tyrosine Kinase 2                                                    | ENSRNOP00000048018 | 2.024  | 7.602  | 1.188      | 1.245      | 2.103  |
| Wwc1    | cytoplasmic phosphoprotein<br>(possible memory enhancer)             | ENSRNOP00000011061 | 1.670  | 5.841  | 2.191      | 1.866      | 5.397  |

376

377

378 **Dataset S1.** Novel candidate genes associated with monogamous mating system across  
379 species. Gene functions are provided by Gene Cards ([www.genecards.org](http://www.genecards.org)) unless  
380 otherwise noted. Localizations are provided by the Allen Mouse Brain Atlas (28).

381

382 **Dataset S2.** For each orthologous gene group (OGG) and each clade the gene with the  
383 largest expression difference between the monogamous and nonmonogamous species is  
384 selected as the representative gene. Ensembl IDs are provided for each OGG and clade  
385 in monogamous to nonmonogamous  $\log_2$  fold-difference.

386

387

388

389  
390  
391  
392  
393  
394  
395  
396  
397  
398  
399  
400  
401  
402  
403  
404  
405  
406  
407  
408  
409  
410  
411  
412  
413  
414  
415  
416  
417  
418  
419  
420  
421  
422  
423  
424  
425  
426  
427  
428  
429  
430  
431  
432  
433  
434  
435  
436  
437  
438  
439

## References:

1. Nugent BM, Stiver KA, Alonzo SH, Hofmann HA (2016) Neuroendocrine profiles associated with discrete behavioral variation in *Symphodus ocellatus*, a species with male alternative reproductive tactics. *Mol Ecol*.
2. Stiver KA, Harris RM, Townsend JP, Hofmann HA, Alonzo SH (2015) Neural Gene Expression Profiles and Androgen Levels Underlie Alternative Reproductive Tactics in the Ocellated Wrasse, *Symphodus ocellatus*. *Ethology* 121(2):152–167.
3. Duque-Wilckens N, et al. (2016) Effects of V1a receptor in bed nucleus of stria terminalis on social behavior and anxiety in males and females. *Neuropharmacology* 110:406–414.
4. Deviche PJ, et al. (2010) Acute stress rapidly decreases plasma testosterone in a free-ranging male songbird: potential site of action and mechanism. *Gen Comp Endocrinol* 169(1):82–90.
5. Van Hout AJ-M, Eens M, Darras VM, Pinxten R (2010) Acute stress induces a rapid increase of testosterone in a songbird: implications for plasma testosterone sampling. *Gen Comp Endocrinol* 168(3):505–10.
6. Kidd MR, Duftner N, Koblmüller S, Sturmhuber C, Hofmann HA (2012) Repeated Parallel Evolution of Parental Care Strategies within *Xenotilapia*, a Genus of Cichlid Fishes from Lake Tanganyika. *PLoS One* 7(2):e31236.
7. Bolger AM, Lohse M, Usadel B (2014) Trimmomatic: a flexible trimmer for Illumina sequence data. *Bioinformatics* 30(15):2114–2120.
8. Li H, Durbin R (2009) Fast and accurate short read alignment with Burrows–Wheeler transform. *Bioinforma* 25(14):1754–1760.
9. Li H, et al. (2009) The Sequence Alignment/Map (SAM) Format and SAMtools. *Bioinformatics* 25(16):2078–9.
10. Li L, Stoeckert CJ, Roos DS (2003) OrthoMCL: Identification of Ortholog Groups for Eukaryotic Genomes. *Genome Res* 13(9):2178–2189.
11. Dalquen DA, Dessimoz C (2013) Bidirectional best hits miss many orthologs in duplication-rich clades such as plants and animals. *Genome Biol Evol* 5(10):1800–6.
12. Jensen LJ, et al. (2008) eggNOG: automated construction and annotation of orthologous groups of genes. *Nucleic Acids Res* 36(Database issue):D250-4.
13. Waterhouse RM, Tegenfeldt F, Li J, Zdobnov EM, Kriventseva E V (2013) OrthoDB: a hierarchical catalog of animal, fungal and bacterial orthologs. *Nucleic Acids Res* 41(Database issue):D358-65.
14. Love M, Huber W, Anders S (2014) Moderated estimation of fold change and dispersion for RNA-seq data with DESeq2. *Genome Biol* 15(12):550.
15. Rosenblatt J, Stein J (2014) RRHO: Test overlap using the Rank-Rank Hypergeometric test.
16. Benjamini Y, Yekutieli D (2001) The Control of the False Discovery Rate in Multiple Testing under Dependency. *Ann Stat* 29(4):1165–1188.
17. Plaisier SB, Taschereau R, Wong JA, Graeber TG (2010) Rank–rank hypergeometric overlap: identification of statistically significant overlap between gene-expression signatures. *Nucleic Acids Res* 38(17):e169–e169.
18. Liu C-C, et al. (2014) Deficiency in LRP6-Mediated Wnt Signaling Contributes to Synaptic Abnormalities and Amyloid Pathology in Alzheimer’s Disease. *Neuron* 84(1):63–77.
19. Cruciat C-M, Niehrs C (2013) Secreted and Transmembrane Wnt Inhibitors and Activators. *Cold Spring Harb Perspect Biol* 5(3). doi:10.1101/cshperspect.a015081.
20. Garcia-Diaz B, et al. (2015) Loss of lysophosphatidic acid receptor LPA1 alters

- 440 oligodendrocyte differentiation and myelination in the mouse cerebral cortex.  
441 *Brain Struct Funct* 220(6):3701–3720.
- 442 21. Lasky JL, Wu H (2005) Notch signaling, brain development, and human disease.  
443 *Pediatr Res* 57(5 Pt 2):104R–109R.
- 444 22. Maynard KR, Stein E (2012) DSCAM Contributes to Dendrite Arborization and  
445 Spine Formation in the Developing Cerebral Cortex. *J Neurosci* 32(47):16637–  
446 16650.
- 447 23. Huang Y-Y, Haug MF, Gesemann M, Neuhauss SCF (2012) Novel Expression  
448 Patterns of Metabotropic Glutamate Receptor 6 in the Zebrafish Nervous System.  
449 *PLoS One* 7(4):e35256.
- 450 24. Metzler M, et al. (2003) Disruption of the endocytic protein HIP1 results in  
451 neurological deficits and decreased AMPA receptor trafficking. *EMBO J*  
452 22(13):3254–3266.
- 453 25. Mills IG, et al. (2005) Huntingtin interacting protein 1 modulates the transcriptional  
454 activity of nuclear hormone receptors. *J Cell Biol* 170(2):191–200.
- 455 26. Kleefstra T, et al. (2012) Disruption of an EHMT1-associated chromatin-  
456 modification module causes intellectual disability. *Am J Hum Genet* 91(1):73–82.
- 457 27. Waltl S (2015) Mutations in SLC6A17 cause autosomal-recessive intellectual  
458 disability. *Clin Genet* 88(2):136–137.
- 459 28. Allen Mouse Brain Atlas 2004. Available at: <http://mouse.brain-map.org/>.
- 460 29. Maere S, Heymans K, Kuiper M (2005) BiNGO: a Cytoscape plugin to assess  
461 overrepresentation of Gene Ontology categories in Biological Networks.  
462 *Bioinforma* 21(16):3448–3449.
- 463 30. Hedges SB, Dudley J, Kumar S (2006) TimeTree: a public knowledge-base of  
464 divergence times among organisms. *Bioinforma* 22(23):2971–2972.
- 465 31. Gibbons FD, Roth FP (2002) Judging the Quality of Gene Expression-Based  
466 Clustering Methods Using Gene Annotation. *Genome Res* 12(10):1574–1581.
- 467 32. Paradis E, Claude J, Strimmer K (2004) APE: Analyses of phylogenetics and  
468 evolution in R language. *Bioinformatics* 20. doi:10.1093/bioinformatics/btg412.
- 469 33. Edgar R, Domrachev M, Lash AE (2002) Gene Expression Omnibus: NCBI gene  
470 expression and hybridization array data repository. *Nucleic Acids Res* 30(1):207–  
471 210.
- 472 34. Conway JR, Lex A, Gehlenborg N (2017) UpSetR: an R package for the  
473 visualization of intersecting sets and their properties. *Bioinformatics* 33(18):2938–  
474 2940.
- 475 35. Getz LL, Carter CS (1980) Social organization in *Microtus ochrogaster*  
476 populations. *Biologist* 62(1–4):56–69.
- 477 36. Getz LL, Carter CS, Gavish L (1981) The Mating System of the Prairie Vole,  
478 *Microtus ochrogaster*: Field and Laboratory Evidence for Pair-Bonding. *Behav*  
479 *Ecol Sociobiol* 8(3):189–194.
- 480 37. Stalling DT (1990) *Microtus ochrogaster*. *Mamm Species*:1–9.
- 481 38. Solomon NG (1993) Comparison of parental behavior in male and female prairie  
482 voles (*Microtus ochrogaster*). *Can J Zool* 71(2):434–437.
- 483 39. Lonstein JS, De Vries GJ (1999) Comparison of the parental behavior of pair-  
484 bonded female and male prairie voles (*Microtus ochrogaster*). *Physiol Behav*  
485 66(1):33–40.
- 486 40. Thomas JA, Birney EC (1979) Parental Care and Mating System of the Prairie  
487 Vole, *Microtus ochrogaster*. *Behav Ecol Sociobiol* 5(2):171–186.
- 488 41. Oliveras D, Novak M (1986) A comparison of paternal behaviour in the meadow  
489 vole *Microtus pennsylvanicus*, the pine vole *M. pinetorum* and the prairie vole *M.*  
490 *ochrogaster*. *Anim Behav* 34(2):519–526.



- 491 42. Heske EJ, Ostfeld RS (1990) Sexual Dimorphism in Size, Relative Size of Testes,  
492 and Mating Systems in North American Voles. *J Mammal* 71(4):510–519.
- 493 43. Dewsbury DA, Baumgardner DJ, Evans RL, Webster DG (1980) Sexual  
494 Dimorphism for Body Mass in 13 Taxa of Muroid Rodents under Laboratory  
495 Conditions. *J Mammal* 61(1):146–149.
- 496 44. Gruder-Adams S, Getz LL (1985) Comparison of the Mating System and Paternal  
497 Behavior in *Microtus ochrogaster* and *M. pennsylvanicus*. *J Mammal* 66(1):165  
498 LP-167.
- 499 45. Getz LL (1961) Home Ranges, Territoriality, and Movement of the Meadow Vole.  
500 *J Mammal* 42(1):24–36.
- 501 46. Sadleir RMFS (1965) The Relationship between Agonistic Behaviour and  
502 Population Changes in the Deermouse, *Peromyscus maniculatus* (Wagner). *J*  
503 *Anim Ecol* 34(2):331–352.
- 504 47. Boonstra R, Xia X, Pavone L (1993) Mating system of the meadow vole, *Microtus*  
505 *pennsylvanicus*. *Behav Ecol* 4(1):83–89.
- 506 48. McCabe T, Blanchard B (1950) *Three species of Peromyscus* (Rood Association,  
507 Santa Barbara, CA).
- 508 49. Ribble DO (1992) Lifetime Reproductive Success and its Correlates in the  
509 Monogamous Rodent, *Peromyscus californicus*. *J Anim Ecol* 61(2):457–468.
- 510 50. Merritt J (1999) California Mouse. *The Smithsonian Book of North American*  
511 *Mammals*, eds Wilson D, Ruff S (Smithsonian Institution Press, Washington, D.C.),  
512 pp 565–566.
- 513 51. Ribble D, Salvioni M (1990) Social organization and nest co-occupancy in  
514 *Peromyscus californicus*, a monogamous rodent. *Behav Ecol Sociobiol* 26(1):9–  
515 15.
- 516 52. Gubernick DJ, Alberts JR (1987) The biparental care system of the California  
517 mouse, *Peromyscus californicus*. *J Comp Psychol* 101(2):169–177.
- 518 53. Bester-Meredith JK, Young LJ, Marler CA (1999) Species Differences in Paternal  
519 Behavior and Aggression in *Peromyscus* and Their Associations with Vasopressin  
520 Immunoreactivity and Receptors. *Horm Behav* 36(1):25–38.
- 521 54. Dudley D (1974) Contributions of paternal care to the growth and development of  
522 the young in *Peromyscus californicus*. *Behav Biol* 11(2):155–166.
- 523 55. Gubernick DJ, Teferi T (2000) Adaptive Significance of Male Parental Care in a  
524 Monogamous Mammal. *Proc Biol Sci* 267(1439):147–150.
- 525 56. Bredy TW, Brown RE, Meaney MJ (2007) Effect of resource availability on  
526 biparental care, and offspring neural and behavioral development in the California  
527 mouse (*Peromyscus californicus*). *Eur J Neurosci* 25(2):567–575.
- 528 57. Trainor BC, Finy MS, Nelson RJ (2008) Paternal aggression in a biparental  
529 mouse: Parallels with maternal aggression. *Horm Behav* 53(1):200–207.
- 530 58. Trainor BC, Marler CA (2001) Testosterone, Paternal Behavior, and Aggression in  
531 the Monogamous California Mouse (*Peromyscus californicus*). *Horm Behav*  
532 40(1):32–42.
- 533 59. Campi KL, Jameson CE, Trainor BC (2013) Sexual Dimorphism in the Brain of the  
534 Monogamous California Mouse (*Peromyscus californicus*). *Brain Behav Evol*  
535 81(4):236–249.
- 536 60. Kirkland GL, Layne NJ (1989) *Advances in the Study of Peromyscus (Rodentia)*  
537 (Texas Tech University Press, Lubbock, Texas).
- 538 61. Ribble DO, Millar JS (1996) The mating system of northern populations of  
539 *Peromyscus maniculatus* as revealed by radiotelemetry and DNA fingerprinting.  
540 *Écoscience* 3(4):423–428.
- 541 62. Wolff JO, Freeberg MH, Dueser RD (1983) Interspecific Territoriality in Two

- 542 Sympatric Species of *Peromyscus* (Rodentia: Cricetidae). *Behav Ecol Sociobiol*  
543 12(3):237–242.
- 544 63. Wolff JO, Dueser RD, Berry KS (1985) Food Habits of Sympatric *Peromyscus*  
545 *leucopus* and *Peromyscus maniculatus*. *J Mammal* 66(4):795–798.
- 546 64. Hartung TG, Dewsbury DA (1979) Paternal behavior in six species of muroid  
547 rodents. *Behav Neural Biol* 26(4):466–478.
- 548 65. Jašarević E, et al. (2013) Evolution of monogamy, paternal investment, and  
549 female life history in *Peromyscus*. *J Comp Psychol* 127(1):91–102.
- 550 66. Bollmann K, Reyer H-U (1999) Why does monogamy prevail in the Alpine Water  
551 Pipit? *Proceedings of the 22nd International Ornithological Congress*, eds Adams  
552 NJ, Slotow RH (BirdLife South Africa, Johannesburg), pp 2666–2688.
- 553 67. Rauter C, Reyer H-U (1997) Incubation pattern and foraging effort in the female  
554 Water Pipit *Anthus spinoletta*. *Ibis (Lond 1859)* 139(3):441–446.
- 555 68. Santos ESA, Nakagawa S (2013) Breeding Biology and Variable Mating System  
556 of a Population of Introduced Dunnocks *Prunella modularis* in New Zealand. *PLoS*  
557 *One* 8(7):e69329.
- 558 69. Davies N (1992) *Dunnock behaviour and social evolution* (Oxford University  
559 Press, Oxford).
- 560 70. Burke T, Daviest NB, Bruford MW, Hatchwell BJ (1989) Parental care and mating  
561 behaviour of polyandrous dunnocks *Prunella modularis* related to paternity by  
562 DNA fingerprinting. *Nature* 338(6212):249–251.
- 563 71. Davies NB (1985) Cooperation and conflict among dunnocks, *Prunella modularis*,  
564 in a variable mating system. *Anim Behav* 33:628–648.
- 565 72. Møller AP, Birkhead TR, Moller AP, Birkhead TR (1994) The Evolution of  
566 Plumage Brightness in Birds is Related to Extrapair Paternity. *Evolution (N Y)*  
567 48(4):1089–1100.
- 568 73. Brown JL, Twomey E, Morales V, Summers K (2008) Phytotelm size in relation to  
569 parental care and mating strategies in two species of Peruvian poison frogs.  
570 *Behaviour* 145(9):1139–1165.
- 571 74. Brown JL, Morales V, Summers K (2010) A key ecological trait drove the evolution  
572 of biparental care and monogamy in an amphibian. *Am Nat* 175(4):436–446.
- 573 75. Tumulty J, Morales V, Summers K (2014) The biparental care hypothesis for the  
574 evolution of monogamy: experimental evidence in an amphibian. *Behav Ecol*  
575 25(2):262–270.
- 576 76. Pröhl H, Hödl W (1999) Parental investment, potential reproductive rates, and  
577 mating system in the strawberry dart-poison frog, *Dendrobates pumilio*. *Behav*  
578 *Ecol Sociobiol* 46(4):215–220.
- 579 77. Meuche I, Linsenmair KE, Pröhl H (2012) Intrasexual competition, territoriality and  
580 acoustic communication in male strawberry poison frogs (*Oophaga pumilio*).  
581 *Behav Ecol Sociobiol* 66(4):613–621.
- 582 78. Bunnell P (1973) Vocalizations in the territorial behavior of the frog *Dendrobates*  
583 *pumilio*. *Copeia*:277–284.
- 584 79. Weygoldt P (1987) Evolution of parental care in dart poison frogs (Amphibia:  
585 Anura: Dendrobatidae). *J Zool Syst Evol Res* 25(1):51–67.
- 586 80. Pröhl H, Berke O (2001) Spatial Distributions of Male and Female Strawberry  
587 Poison Frogs and Their Relation to Female Reproductive Resources. *Oecologia*  
588 129(4):534–542.
- 589 81. Konings A, Dieckhoff HW (1992) *Tanganyika Secrets* (Cichlid Press, Miami,  
590 Florida).
- 591 82. Konings A (1996) *Guide to Tanganyika Cichlids* (Back to Nature, Jonsered,  
592 Sweden).

- 593 83. Madison DM (1985) Activity rhythms and spacing. *Biology of New World Microtus*,  
594 ed Tamarin RH (American Society of Mammalogists, Stillwater, Oklahoma), pp  
595 373–419.
- 596 84. Cole FR, Batzli GO (1979) Nutrition and Population Dynamics of the Prairie Vole,  
597 *Microtus ochrogaster*, in Central Illinois. *J Anim Ecol* 48(2):455–470.
- 598 85. Zimmerman EG (1965) A Comparison of Habitat And Food of Two Species of  
599 *Microtus*. *J Mammal* 46(4):605–612.
- 600 86. Getz LL, McGuire B (1997) Communal nesting in prairie voles (*Microtus*  
601 *ochrogaster*): formation, composition, and persistence of communal groups. *Can J*  
602 *Zool* 75(4):525–534.
- 603 87. Getz L, Hofmann J (1986) Social organization in free-living prairie voles, *Microtus*  
604 *ochrogaster*. *Behav Ecol Sociobiol* 18(4):275–282.
- 605 88. Burt WH, Grossenheider RP (1976) *A field guide to the mammals* (Houghton  
606 Mifflin, Boston).
- 607 89. Reich LM (1981) *Microtus pennsylvanicus*. *Mamm Species Arch* 159:1 LP-8.
- 608 90. Lindroth RL, Batzli GO (1984) Food habits of the meadow vole (*Microtus*  
609 *pennsylvanicus*) in bluegrass and prairie habitats. *J Mammal* 65(4):600–606.
- 610 91. Webster AB, Brooks RJ (1981) Social Behavior of *Microtus pennsylvanicus* in  
611 Relation to Seasonal Changes in Demography. *J Mammal* 62(4):738–751.
- 612 92. Madison DM, FitzGerald RW, McShea WJ (1984) Dynamics of Social Nesting in  
613 Overwintering Meadow Voles (*Microtus pennsylvanicus*): Possible Consequences  
614 for Population Cycling. *Behav Ecol Sociobiol* 15(1):9–17.
- 615 93. Hudson JW (1967) Variations in the patterns of torpidity of small homiotherms.  
616 *Proceedings of the Third International Symposium of Mammalian Hibernation*, eds  
617 Fisher KC, Lyman CP, Schonbaum E, South FE (Elsevier, New York), pp 30–46.
- 618 94. Merritt JF (1974) Factors Influencing the Local Distribution of *Peromyscus*  
619 *californicus* in Northern California. *J Mammal* 55(1):102–114.
- 620 95. King JA (1968) *Biology of Peromyscus (Rodentia)* (The American Society of  
621 Mammalogists, Stillwater, Oklahoma).
- 622 96. O'Farrell MJ (1974) Seasonal Activity Patterns of Rodents in a Sagebrush  
623 Community. *J Mammal* 55(4):809–823.
- 624 97. Whitaker Jr. JO, Cudmore WW (1987) Food and ectoparasites of shrews of south  
625 central Indiana with emphasis on *Sorex fumeus* and *Sorex hoyi*. *Proc Indiana Acad*  
626 *Sci* 96(543–552).
- 627 98. Melendez L, Laiolo P (2014) The role of climate in constraining the elevational  
628 range of the Water Pipit *Anthus spinoletta* in an alpine environment. *Ibis (Lond*  
629 *1859)* 156(2):276–287.
- 630 99. Alström P, Mild K (1996) The identification of Rock, Water and Buff-bellied Pipits.  
631 *Alula* 2(4):161–175.
- 632 100. Frey-Roos F, Brodmann PA, Reyer H-U (1995) Relationships between food  
633 resources, foraging patterns, and reproductive success in the water pipit, *Anthus*  
634 sp. *spinoletta*. *Behav Ecol* 6(3):287–295.
- 635 101. Bollmann K, Brodmann PA, Reyer HU (1997) Territory quality and reproductive  
636 success: Can Water Pipits *Anthus spinoletta* assess the relationship reliably?  
637 *Ardea-Wageningen* 85:83–98.
- 638 102. Bishton G (1986) The diet and foraging behaviour of the Dunnock *Prunella*  
639 *modularis* in a hedgerow habitat. *Ibis (Lond 1859)* 128(4):526–539.
- 640 103. Lack P (1986) *The Atlas of Wintering Birds in Britain and Ireland* (A&C Black  
641 Publisher, London).
- 642 104. Limerick S (1980) Courtship Behavior and Oviposition of the Poison-Arrow Frog  
643 *Dendrobates pumilio*. *Herpetologica* 36(1):69–71.

- 644 105. Caldwell JP, Summers KD (2003) Imitating poison frog, *Dendrobates imitator*.  
645 *Grzimek's Animal Life Encyclopedia, Volume 6, Amphibians*, eds Hutchins M,  
646 Duellman WE, Schlager N (Gale Group, Farmington Hills, Michigan). 2nd Ed.  
647 106. Donnelly MA (1991) Feeding Patterns of the Strawberry Poison Frog,  
648 *Dendrobates pumilio* (Anura: Dendrobatidae). *Copeia* 1991(3):723–730.  
649 107. Pollen AA, et al. (2007) Environmental Complexity and Social Organization Sculpt  
650 the Brain in Lake Tanganyikan Cichlid Fish. *Brain Behav Evol* 70(1):21–39.  
651 108. Herrmann H-J (1996) *Agualex-catalog: Cichlids from Tanganyika* (Dahne Verlag,  
652 Ettlingen, Germany).  
653 109. Kumar S, Stecher G, Suleski M, Hedges SB (2017) TimeTree: A Resource for  
654 Timelines, Timetrees, and Divergence Times. *Mol Biol Evol* 34(7):1812–1819.  
655 110. Julie P, et al. (2015) Out of Himalaya: the impact of past Asian environmental  
656 changes on the evolutionary and biogeographical history of Dipodoidea  
657 (Rodentia). *J Biogeogr* 42(5):856–870.  
658 111. Fabre P-H, Hautier L, Dimitrov D, P Douzery EJ (2012) A glimpse on the pattern  
659 of rodent diversification: a phylogenetic approach. *BMC Evol Biol* 12(1):88.  
660 112. Babb PL, Fernandez-Duque E, Schurr TG (2010) AVPR1A Sequence Variation in  
661 Monogamous Owl Monkeys (*Aotus azarai*) and Its Implications for the Evolution of  
662 Platyrrhine Social Behavior. *J Mol Evol* 71(4):279–297.  
663 113. Fritz SA, Bininda-Emonds OR, Purvis A (2009) Geographical variation in  
664 predictors of mammalian extinction risk: big is bad, but only in the tropics. *Ecol*  
665 *Lett* 12(6):538–549.  
666 114. León-Paniagua L, Navarro-Sigüenza AG, Hernández-Baños BE, Morales JC  
667 (2007) Diversification of the arboreal mice of the genus *Habromys* (Rodentia:  
668 Cricetidae: Neotominae) in the Mesoamerican highlands. *Mol Phylogenet Evol*  
669 42(3):653–664.  
670 115. Davies KTJ, Bates PJJ, Maryanto I, Cotton JA, Rossiter SJ (2013) The Evolution  
671 of Bat Vestibular Systems in the Face of Potential Antagonistic Selection  
672 Pressures for Flight and Echolocation. *PLoS One* 8(4):e61998.  
673 116. Tapaltsyan V, et al. (2015) Continuously Growing Rodent Molars Result from a  
674 Predictable Quantitative Evolutionary Change over 50 Million Years. *Cell Rep*  
675 11(5):673–680.  
676 117. Psouni E, Janke A, Garwicz M (2012) Impact of Carnivory on Human  
677 Development and Evolution Revealed by a New Unifying Model of Weaning in  
678 Mammals. *PLoS One* 7(4):e32452.  
679 118. Soria-Carrasco V, Castresana J (2012) Diversification rates and the latitudinal  
680 gradient of diversity in mammals. *Proc R Soc B Biol Sci* 279(1745):4148 LP-4155.  
681 119. Abramson NI, Lebedev VS, Tesakov AS, Bannikova AA (2009) Supraspecies  
682 relationships in the subfamily Arvicolinae (Rodentia, Cricetidae): An unexpected  
683 result of nuclear gene analysis. *Mol Biol* 43(5):834.  
684 120. Steppan SJ, Adkins RM, Anderson J (2004) Phylogeny and Divergence-Date  
685 Estimates of Rapid Radiations in Muroid Rodents Based on Multiple Nuclear  
686 Genes. *Syst Biol* 53(4):533–553.  
687 121. Selvatti AP, Gonzaga LP, Russo CA de M (2015) A Paleogene origin for crown  
688 passerines and the diversification of the Oscines in the New World. *Mol*  
689 *Phylogenet Evol* 88:1–15.  
690 122. Claramunt S, Cracraft J (2015) A new time tree reveals Earth history's imprint on  
691 the evolution of modern birds. *Sci Adv* 1(11). Available at:  
692 <http://advances.sciencemag.org/content/1/11/e1501005.abstract>.  
693 123. Roquet C, Lavergne S, Thuiller W (2014) One Tree to Link Them All: A  
694 Phylogenetic Dataset for the European Tetrapoda. *PLoS Curr*

695 6:ecurrents.tol.5102670fff8aa5c918e78f5592790e48.  
696 124. Drovetski S V., et al. (2013) Geographic mode of speciation in a mountain  
697 specialist Avian family endemic to the Palearctic. *Ecol Evol* 3(6):1518–1528.  
698 125. Jetz W, Thomas GH, Joy JB, Hartmann K, Mooers AO (2012) The global diversity  
699 of birds in space and time. *Nature* 491:444.  
700 126. Braun EL, et al. (2011) Homoplastic microinversions and the avian tree of life.  
701 *BMC Evol Biol* 11(1):141.  
702 127. Fjeldså J, Irestedt M, Ericson Pgp, Zuccon D (2010) The Cinnamon Ibon  
703 *Hypocryptadius cinnamomeus* is a forest canopy sparrow. *Ibis (Lond 1859)*  
704 152(4):747–760.  
705 128. Pyron RA (2014) Biogeographic Analysis Reveals Ancient Continental Vicariance  
706 and Recent Oceanic Dispersal in Amphibians. *Syst Biol* 63(5):779–797.  
707 129. Gomez-Mestre I, Pyron RA, Wiens JJ (2012) Phylogenetic Analyses Reveal  
708 Unexpected Patterns In The Evolution Of Reproductive Modes In Frogs. *Evolution*  
709 (N Y) 66(12):3687–3700.  
710 130. Koblmüller S, Salzburger W, Sturmbauer C (2004) Evolutionary Relationships in  
711 the Sand-Dwelling Cichlid Lineage of Lake Tanganyika Suggest Multiple  
712 Colonization of Rocky Habitats and Convergent Origin of Biparental  
713 Mouthbrooding. *J Mol Evol* 58(1):79–96.  
714
